# Supplementary material
Source: MDPI journal article supplement (https://www.mdpi.com/2073-4352/10/11/1051)

Supplementary Material

# Termination Effects in Aluminosilicate and Aluminogermanate Imogolite Nanotubes: a Density Functional Theory Study

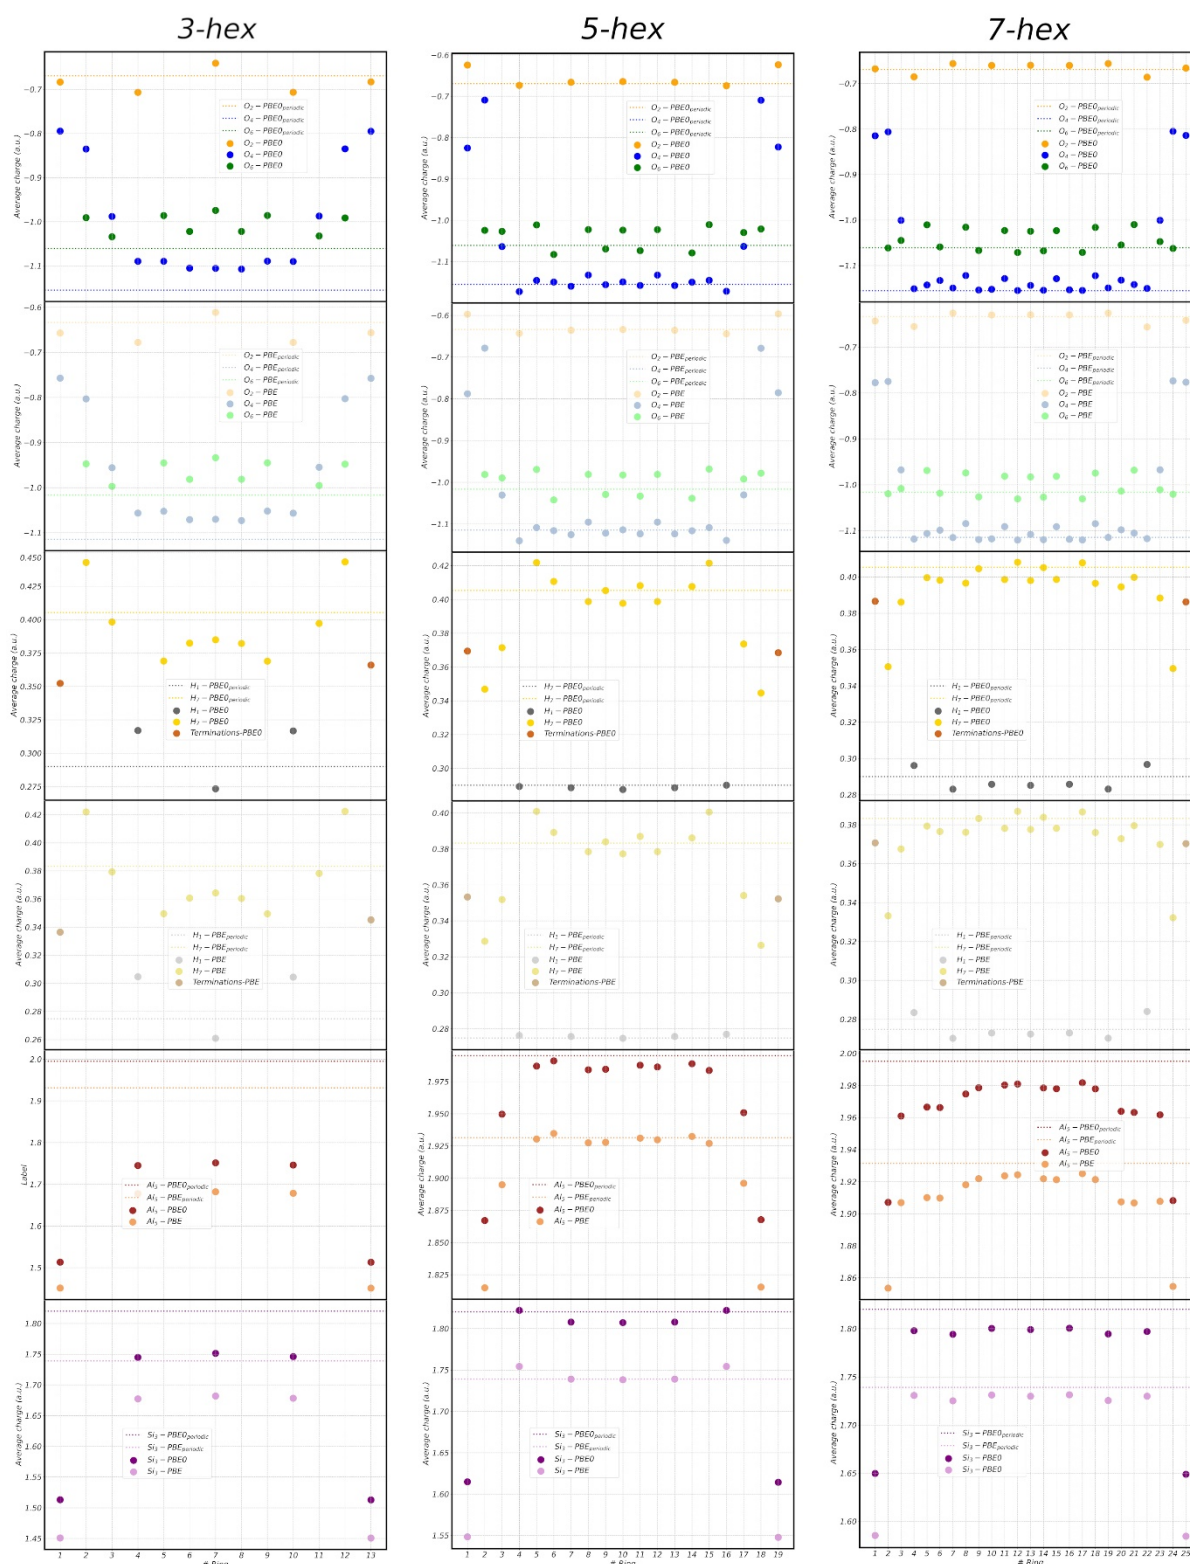

**Figure 1.** Ring-averaged, atom-resolved DDAPC charge (a.u.) for the hex-3, hex-5 and hex-7 models of the **OH-terminated** AlSi NT at PBE0-TC-LRC (shorthand notation: PBE0) and PBE level. For sake of clarity, the PBE and PBE0-TC-LRC results for the  $O_{2,4,6}$  and  $H_{1,7}$  atoms are displayed on different panels. The “Terminations” labeling is used to indicate the H-atoms belonging to the terminal OH groups saturating the terminal  $Si_3$ -atoms (see Figure 1).

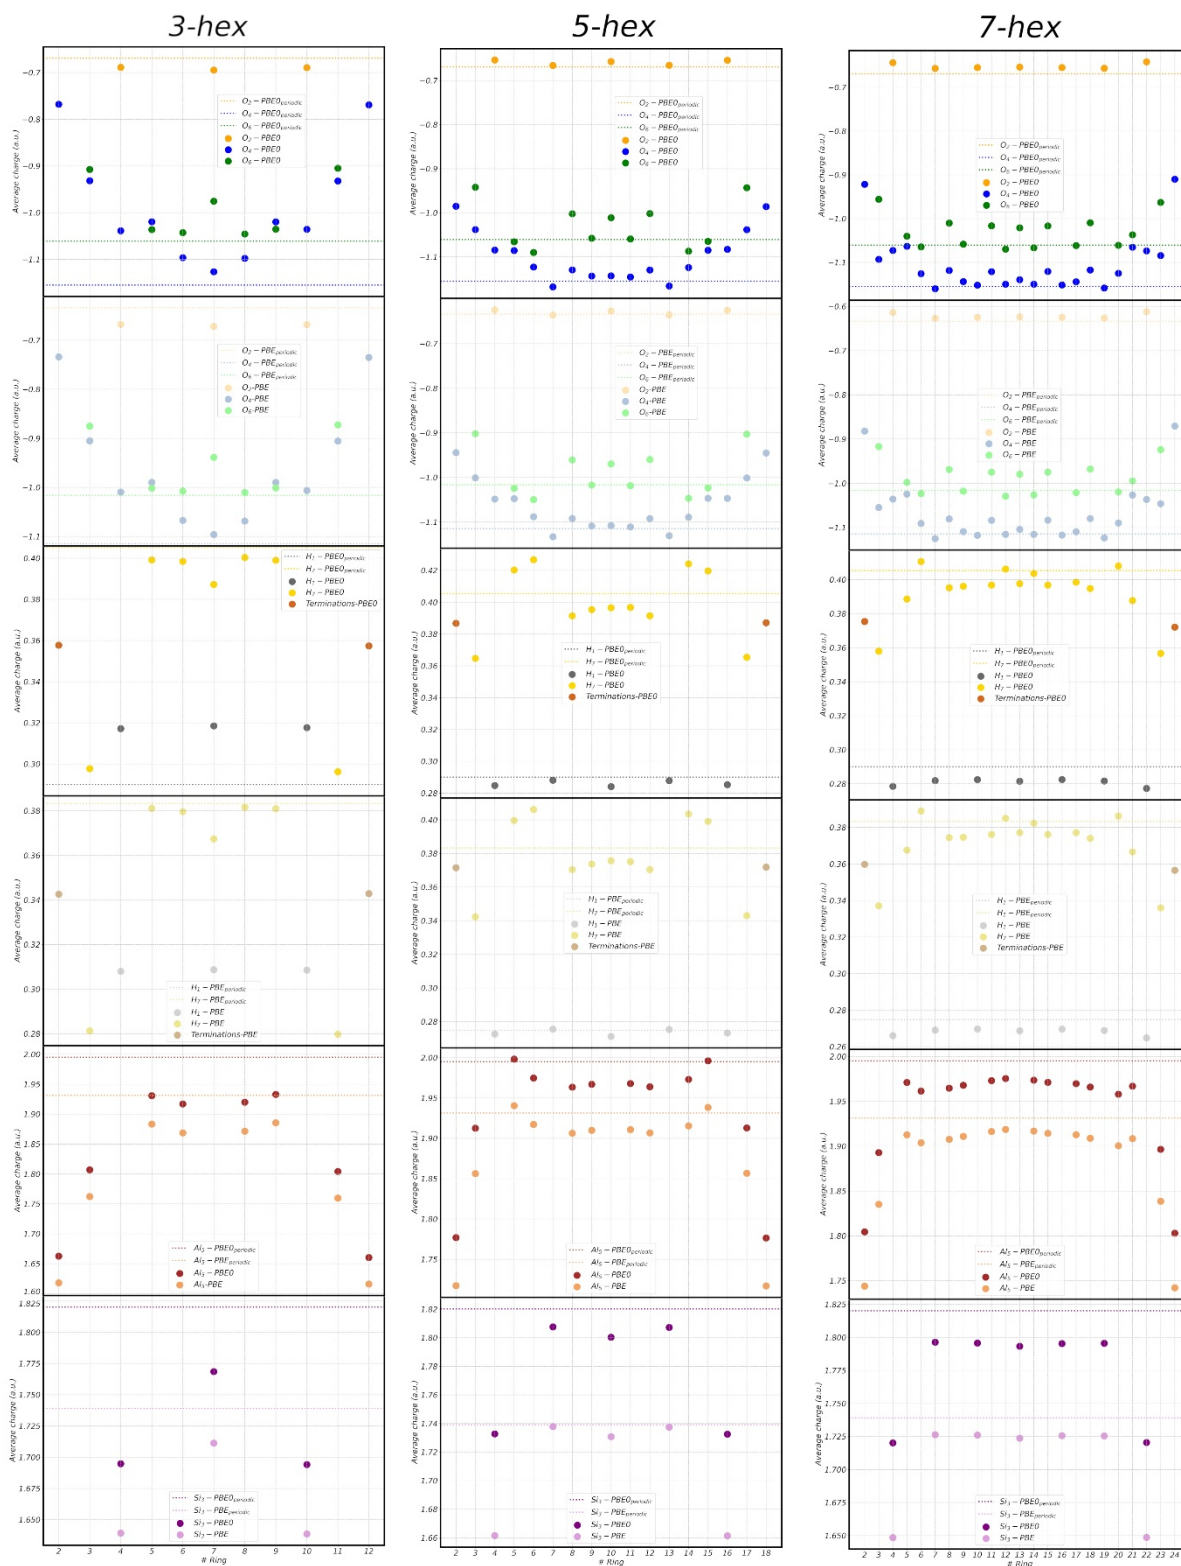

**Figure 2.** Ring-averaged, atom-resolved DDAPC charge (a.u.) for the hex-3, hex-5 and hex-7 models of the **H<sub>2</sub>O-terminated** AlSi NT at PBE0-TC-LRC (shorthand notation: PBE0) and PBE level. For sake of clarity, the PBE and PBE0-TC-LRC results for the  $O_{2,4,6}$  and  $H_{1,7}$  atoms are displayed on different

panels. The “Terminations” labeling is used to indicate the H-atoms belonging to the terminal H<sub>2</sub>O molecules saturating the terminal Al<sub>5</sub>-atoms (see Figure 1).

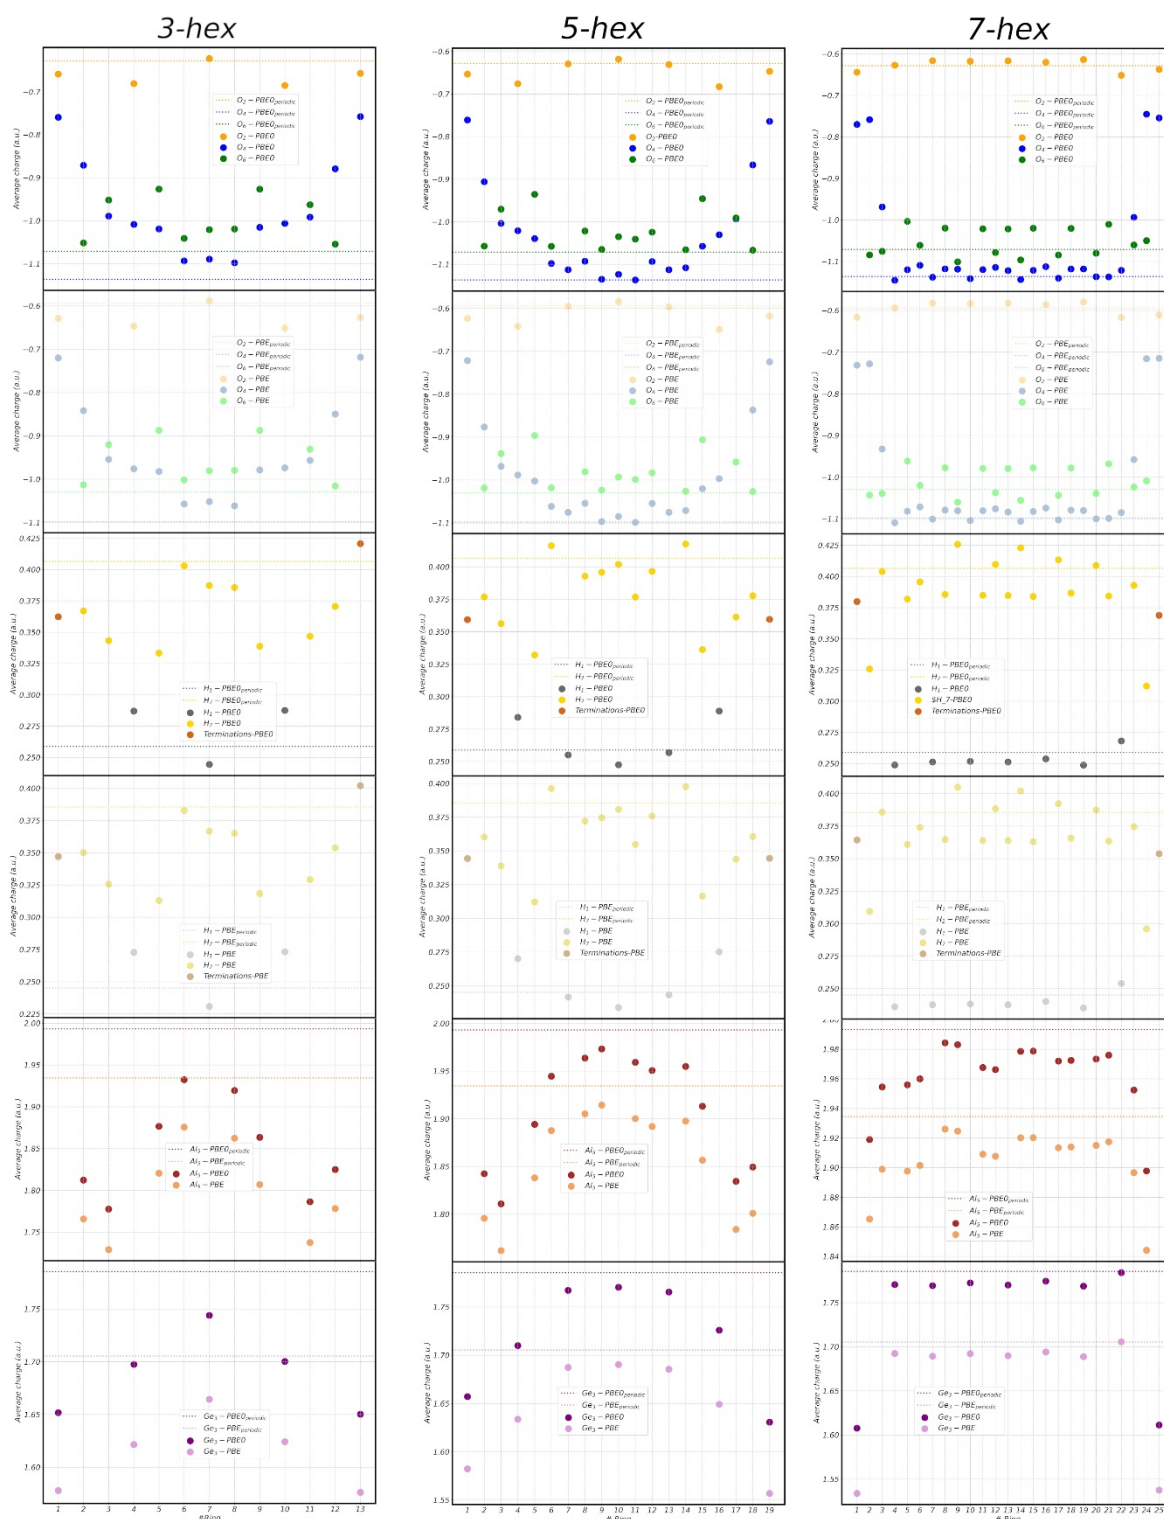

**Figure 3.** Ring-averaged, atom-resolved DDAPC charge (a.u.) for the hex-3, hex-5 and hex-7 models of the OH-terminated AlGe NT at PBE0-TC-LRC (shorthand notation: PBE0) and PBE level. For sake of clarity, the PBE and PBE0-TC-LRC results for the O<sub>2,4,6</sub> and H<sub>1,7</sub> atoms are displayed on different panels. The “Terminations” labeling is used to indicate the H-atoms belonging to the terminal OH groups saturating the terminal Ge<sub>3</sub>-atoms (see Figure 1).



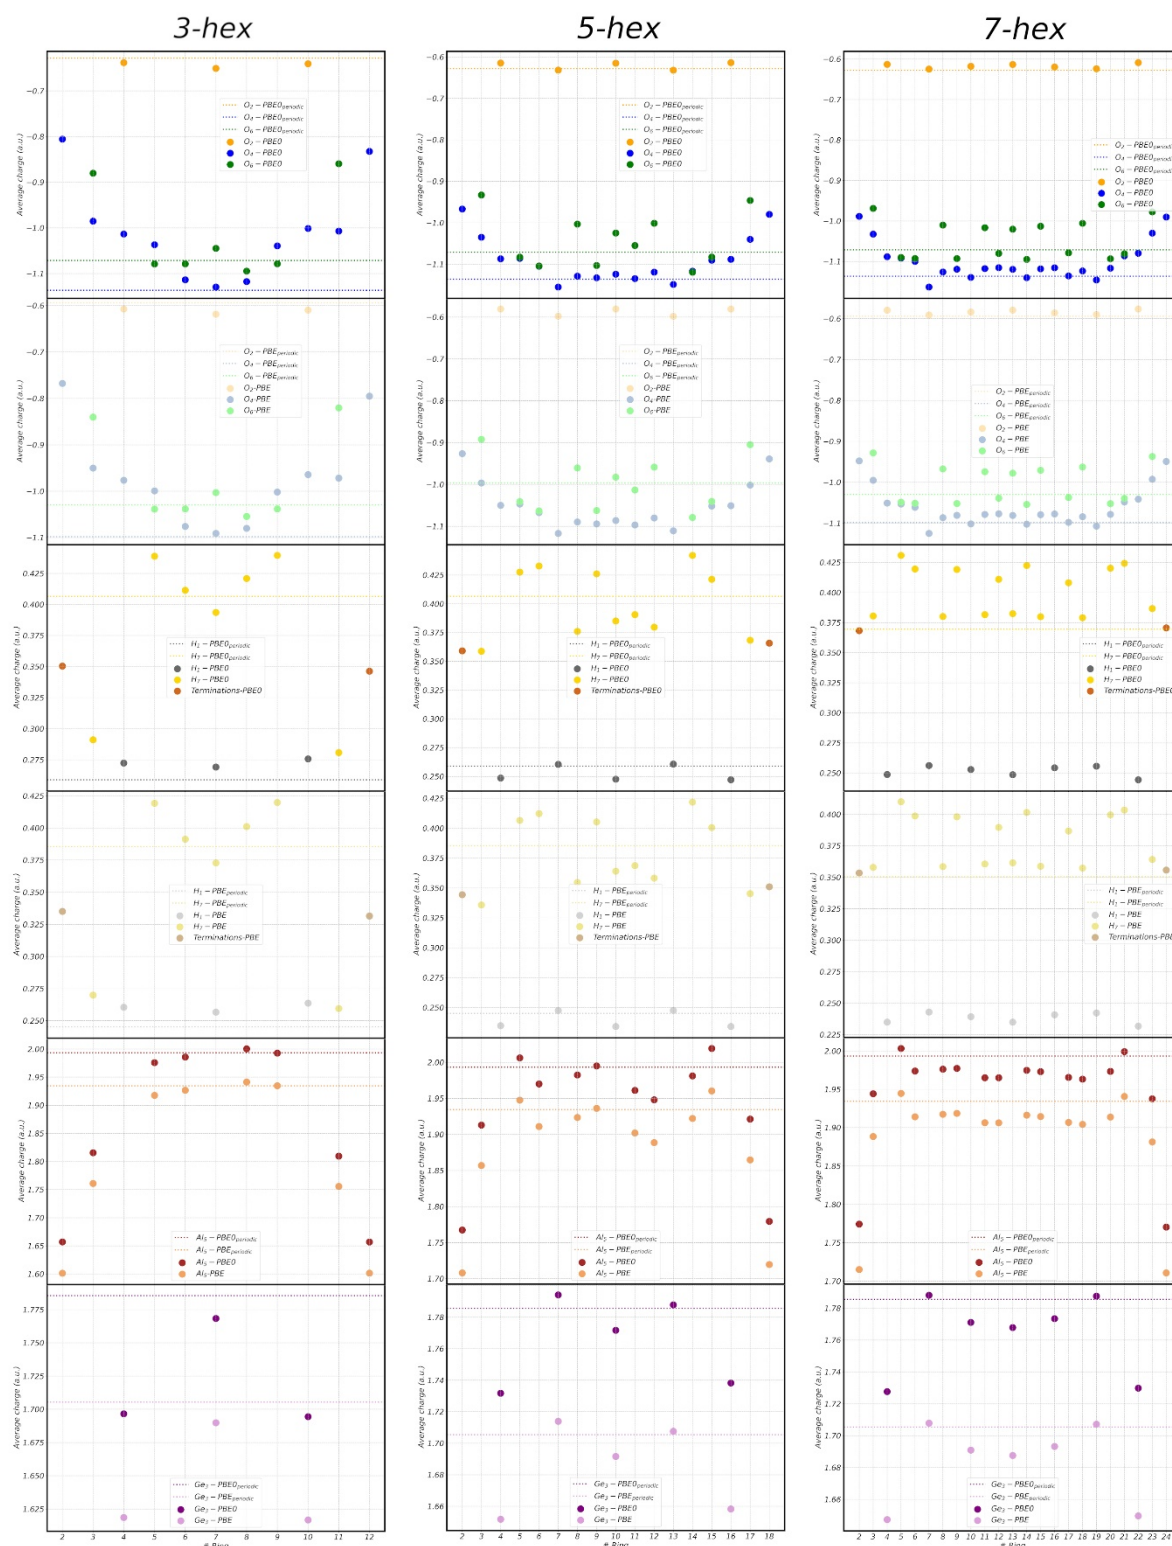

**Figure 4.** Ring-averaged, atom-resolved DDAPC charge (a.u.) for the hex-3, hex-5 and hex-7 models of the  $\text{H}_2\text{O}$ -terminated  $\text{AlGe}$  NT at PBE0-TC-LRC (shorthand notation: PBE0) and PBE level. For sake of clarity, the PBE and PBE0-TC-LRC results for the  $\text{O}_{2,4,6}$  and  $\text{H}_{1,7}$  atoms are displayed on different panels. The “Terminations” labeling is used to indicate the H-atoms belonging to the terminal  $\text{H}_2\text{O}$  molecules saturating the terminal  $\text{Al}_1$ -atoms (see Figure 1).

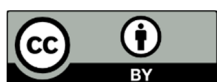

Supplement: s1 [file s1]
